# Supplementary material for: Allergic Diseases and Risk of Malignancy of Gastrointestinal Cancers
Source: MDPI journal article supplement (doi:10.3390/cancers15123219), 2023-06-16
Supplement: s1 [file s1]

**Supplementary Table S1.** Association between Allergic rhinitis and Risk of Gastrointestinal Cancers

| Cancer type      | AR  | Total    |       |                 |                            | Male     |       |                 |                            | Female   |       |                 |                            |
|------------------|-----|----------|-------|-----------------|----------------------------|----------|-------|-----------------|----------------------------|----------|-------|-----------------|----------------------------|
|                  |     | <i>n</i> | Event | IR <sup>a</sup> | HR <sup>b</sup> (95% C.I.) | <i>n</i> | Event | IR <sup>a</sup> | HR <sup>b</sup> (95% C.I.) | <i>n</i> | Event | IR <sup>a</sup> | HR <sup>b</sup> (95% C.I.) |
| Total GI cancers | No  | 4766745  | 99826 | 2.93            | 1(Ref.)                    | 2958412  | 70758 | 3.35            | 1(Ref.)                    | 1808333  | 29068 | 2.25            | 1(Ref.)                    |
|                  | Yes | 3705553  | 69481 | 2.62            | 0.94 (0.93,0.95)           | 1880208  | 43333 | 3.23            | 0.91(0.90,0.92)            | 1825345  | 26148 | 2.00            | 0.96(0.95,0.98)            |
| Esophagus        | No  | 4766745  | 3039  | 0.09            | 1(Ref.)                    | 2958412  | 2834  | 0.13            | 1(Ref.)                    | 1808333  | 205   | 0.02            | 1(Ref.)                    |
|                  | Yes | 3705553  | 1696  | 0.06            | 0.85 (0.80,0.90)           | 1880208  | 1521  | 0.11            | 0.83(0.78,0.89)            | 1825345  | 175   | 0.01            | 0.95(0.78,1.16)            |
| Stomach          | No  | 4766745  | 36254 | 1.05            | 1(Ref.)                    | 2958412  | 27283 | 1.28            | 1(Ref.)                    | 1808333  | 8971  | 0.68            | 1(Ref.)                    |
|                  | Yes | 3705553  | 24534 | 0.91            | 0.93 (0.91,0.94)           | 1880208  | 16705 | 1.23            | 0.91(0.89,0.93)            | 1825345  | 7829  | 0.59            | 0.93(0.90,0.96)            |
| Colorectum       | No  | 4766745  | 41460 | 1.20            | 1(Ref.)                    | 2958412  | 27231 | 1.27            | 1(Ref.)                    | 1808333  | 14229 | 1.08            | 1(Ref.)                    |
|                  | Yes | 3705553  | 29913 | 1.11            | 0.95 (0.94,0.96)           | 1880208  | 16854 | 1.24            | 0.92 (0.90,0.94)           | 1825345  | 13059 | 0.98            | 0.97(0.95,0.99)            |
| Liver            | No  | 4766745  | 22801 | 0.66            | 1(Ref.)                    | 2958412  | 17671 | 0.83            | 1(Ref.)                    | 1808333  | 5130  | 0.39            | 1(Ref.)                    |
|                  | Yes | 3705553  | 14898 | 0.55            | 0.90 (0.88,0.92)           | 1880208  | 10432 | 0.76            | 0.88(0.86,0.90)            | 1825345  | 4466  | 0.33            | 0.94(0.90,0.98)            |
| GB and BT        | No  | 4766745  | 7365  | 0.21            | 1(Ref.)                    | 2958412  | 4595  | 0.21            | 1(Ref.)                    | 1808333  | 2770  | 0.21            | 1(Ref.)                    |
|                  | Yes | 3705553  | 5662  | 0.21            | 1.01 (0.97,1.04)           | 1880208  | 3149  | 0.23            | 0.99 (0.94,1.03)           | 1825345  | 2513  | 0.19            | 1.01(0.96,1.07)            |
| Pancreas         | No  | 4766745  | 15921 | 0.46            | 1(Ref.)                    | 2958412  | 10746 | 0.50            | 1(Ref.)                    | 1808333  | 5175  | 0.39            | 1(Ref.)                    |
|                  | Yes | 3705553  | 11887 | 0.44            | 0.99 (0.97,1.02)           | 1880208  | 6942  | 0.51            | 0.96(0.93,0.99)            | 1825345  | 4945  | 0.37            | 1.03 (0.99,1.07)           |

AR, Allergic rhinitis; BT, biliary tracts; CI, confidential interval; GB gallbladder; GI, gastrointestinal; HR, hazard ratio; IR, incidence rate; N, number; Ref., reference

<sup>a</sup> per 1000 person-years

<sup>b</sup> Adjusted for age, sex, smoking, alcohol consumption, low income, body mass index, diabetes and hypertension

**Supplementary Table S2.** Association between Asthma and Risk of Gastrointestinal Cancers

| Cancer type      | Asthma | Total    |       |                 |                            | Male     |       |                 |                            | Female   |       |                 |                            |
|------------------|--------|----------|-------|-----------------|----------------------------|----------|-------|-----------------|----------------------------|----------|-------|-----------------|----------------------------|
|                  |        | <i>n</i> | Event | IR <sup>a</sup> | HR <sup>b</sup> (95% C.I.) | <i>n</i> | Event | IR <sup>a</sup> | HR <sup>b</sup> (95% C.I.) | <i>n</i> | Event | IR <sup>a</sup> | HR <sup>b</sup> (95% C.I.) |
| Total GI cancers | No     | 4766745  | 99826 | 2.93            | 1(Ref.)                    | 2958412  | 70758 | 3.35            | 1(Ref.)                    | 1808333  | 29068 | 2.25            | 1(Ref.)                    |
|                  | Yes    | 246474   | 7736  | 4.51            | 0.96(0.94,0.98)            | 117344   | 4787  | 5.95            | 0.96(0.93,0.99)            | 129130   | 2949  | 3.23            | 0.96(0.93,1.00)            |
| Esophagus        | No     | 4766745  | 3039  | 0.09            | 1(Ref.)                    | 2958412  | 2834  | 0.13            | 1(Ref.)                    | 1808333  | 205   | 0.02            | 1(Ref.)                    |
|                  | Yes    | 246474   | 238   | 0.14            | 0.96(0.84,1.10)            | 117344   | 208   | 0.25            | 0.93(0.80,1.07)            | 129130   | 30    | 0.03            | 1.34(0.91,1.97)            |
| Stomach          | No     | 4766745  | 36254 | 1.05            | 1(Ref.)                    | 2958412  | 27283 | 1.28            | 1(Ref.)                    | 1808333  | 8971  | 0.68            | 1(Ref.)                    |
|                  | Yes    | 246474   | 2704  | 1.54            | 0.94(0.91,0.98)            | 117344   | 1815  | 2.21            | 0.94(0.90,0.99)            | 129130   | 889   | 0.95            | 0.95(0.89,1.02)            |
| Colorectum       | No     | 4766745  | 41460 | 1.20            | 1(Ref.)                    | 2958412  | 27231 | 1.27            | 1(Ref.)                    | 1808333  | 14229 | 1.08            | 1(Ref.)                    |
|                  | Yes    | 246474   | 3139  | 1.79            | 0.93(0.90,0.97)            | 117344   | 1799  | 2.19            | 0.94(0.90,0.99)            | 129130   | 1340  | 1.44            | 0.93(0.88,0.99)            |
| Liver            | No     | 4766745  | 22801 | 0.66            | 1(Ref.)                    | 2958412  | 17671 | 0.83            | 1(Ref.)                    | 1808333  | 5130  | 0.39            | 1(Ref.)                    |
|                  | Yes    | 246474   | 1739  | 0.99            | 0.96(0.92,1.01)            | 117344   | 1176  | 1.42            | 0.96(0.90,1.01)            | 129130   | 563   | 0.60            | 0.97(0.89,1.06)            |
| GB and BT        | No     | 4766745  | 7365  | 0.21            | 1(Ref.)                    | 2958412  | 4595  | 0.21            | 1(Ref.)                    | 1808333  | 2770  | 0.21            | 1(Ref.)                    |
|                  | Yes    | 246474   | 719   | 0.41            | 0.99(0.92,1.07)            | 117344   | 375   | 0.45            | 0.97(0.87,1.08)            | 129130   | 344   | 0.37            | 1.02 (0.91,1.14)           |
| Pancreas         | No     | 4766745  | 15921 | 0.46            | 1(Ref.)                    | 2958412  | 10746 | 0.50            | 1(Ref.)                    | 1808333  | 5175  | 0.39            | 1(Ref.)                    |
|                  | Yes    | 246474   | 1325  | 0.75            | 0.98(0.93,1.04)            | 117344   | 740   | 0.89            | 0.95(0.88,1.03)            | 129130   | 585   | 0.63            | 1.03 (0.94,1.12)           |

BT, biliary tracts; CI, confidential interval; GB gallbladder; GI, gastrointestinal; HR, hazard ratio; IR, incidence rate; N, number; Ref., reference

<sup>a</sup> per 1000 person-years

<sup>b</sup> Adjusted for age, sex, smoking, alcohol consumption, low income, body mass index, diabetes and hypertension

**Supplementary Table S3.** Association between Atopic dermatitis and Risk of Gastrointestinal Cancers

| Cancer type      | AD  | Total    |       |                 |                            | Male     |       |                 |                            | Female   |       |                 |                            |
|------------------|-----|----------|-------|-----------------|----------------------------|----------|-------|-----------------|----------------------------|----------|-------|-----------------|----------------------------|
|                  |     | <i>n</i> | Event | IR <sup>a</sup> | HR <sup>b</sup> (95% C.I.) | <i>n</i> | Event | IR <sup>a</sup> | HR <sup>b</sup> (95% C.I.) | <i>n</i> | Event | IR <sup>a</sup> | HR <sup>b</sup> (95% C.I.) |
| Total GI cancers | No  | 4766745  | 99826 | 2.93            | 1(Ref.)                    | 2958412  | 70758 | 3.35            | 1(Ref.)                    | 1808333  | 29068 | 2.25            | 1(Ref.)                    |
|                  | Yes | 91766    | 1965  | 3.00            | 0.98(0.94,1.03)            | 46775    | 1308  | 3.94            | 0.97(0.92,1.03)            | 44991    | 657   | 2.04            | 0.97(0.89,1.04)            |
| Esophagus        | No  | 4766745  | 3039  | 0.09            | 1(Ref.)                    | 2958412  | 2834  | 0.13            | 1(Ref.)                    | 1808333  | 205   | 0.02            | 1(Ref.)                    |
|                  | Yes | 91766    | 54    | 0.08            | 0.91(0.69,1.19)            | 46775    | 47    | 0.14            | 0.85(0.64,1.14)            | 44991    | 7     | 0.02            | 1.46(0.69,3.11)            |
| Stomach          | No  | 4766745  | 36254 | 1.05            | 1(Ref.)                    | 2958412  | 27283 | 1.28            | 1(Ref.)                    | 1808333  | 8971  | 0.68            | 1(Ref.)                    |
|                  | Yes | 91766    | 702   | 1.06            | 0.97(0.90,1.05)            | 46775    | 508   | 1.51            | 0.98(0.90,1.07)            | 44991    | 194   | 0.59            | 0.92(0.80,1.06)            |
| Colorectum       | No  | 4766745  | 41460 | 1.20            | 1(Ref.)                    | 2958412  | 27231 | 1.27            | 1(Ref.)                    | 1808333  | 14229 | 1.08            | 1(Ref.)                    |
|                  | Yes | 91766    | 805   | 1.21            | 0.96(0.90,1.03)            | 46775    | 485   | 1.44            | 0.93(0.85,1.02)            | 44991    | 320   | 0.98            | 0.96(0.86,1.07)            |
| Liver            | No  | 4766745  | 22801 | 0.66            | 1(Ref.)                    | 2958412  | 17671 | 0.83            | 1(Ref.)                    | 1808333  | 5130  | 0.39            | 1(Ref.)                    |
|                  | Yes | 91766    | 422   | 0.63            | 0.93(0.84,1.02)            | 46775    | 315   | 0.93            | 0.94(0.84,1.05)            | 44991    | 107   | 0.33            | 0.89(0.73,1.07)            |
| GB and BT        | No  | 4766745  | 7365  | 0.21            | 1(Ref.)                    | 2958412  | 4595  | 0.21            | 1(Ref.)                    | 1808333  | 2770  | 0.21            | 1(Ref.)                    |
|                  | Yes | 91766    | 146   | 0.22            | 0.92(0.78,1.08)            | 46775    | 79    | 0.23            | 0.83(0.66,1.04)            | 44991    | 67    | 0.20            | 1.02(0.80,1.31)            |
| Pancreas         | No  | 4766745  | 15921 | 0.46            | 1(Ref.)                    | 2958412  | 10746 | 0.50            | 1(Ref.)                    | 1808333  | 5175  | 0.39            | 1(Ref.)                    |
|                  | Yes | 91766    | 322   | 0.48            | 0.99(0.88,1.10)            | 46775    | 198   | 0.59            | 0.96(0.83,1.10)            | 44991    | 124   | 0.38            | 1.02(0.85,1.22)            |

AD, atopic dermatitis; BT, biliary tracts; CI, confidential interval; GB gallbladder; GI, gastrointestinal; HR, hazard ratio; IR, incidence rate; N, number; Ref., reference

<sup>a</sup> per 1000 person-years<sup>b</sup> Adjusted for age, sex, smoking, alcohol consumption, low income, body mass index, diabetes and hypertension
